# Supplementary material for: Altertoxin II, a Highly Effective and Specific Compound against Ewing Sarcoma
Source: MDPI journal article supplement (doi:10.3390/cancers13246176), 2021-12-07

Figure 4A – EWS-FLI-1 and  $\beta$ -actin (merged)

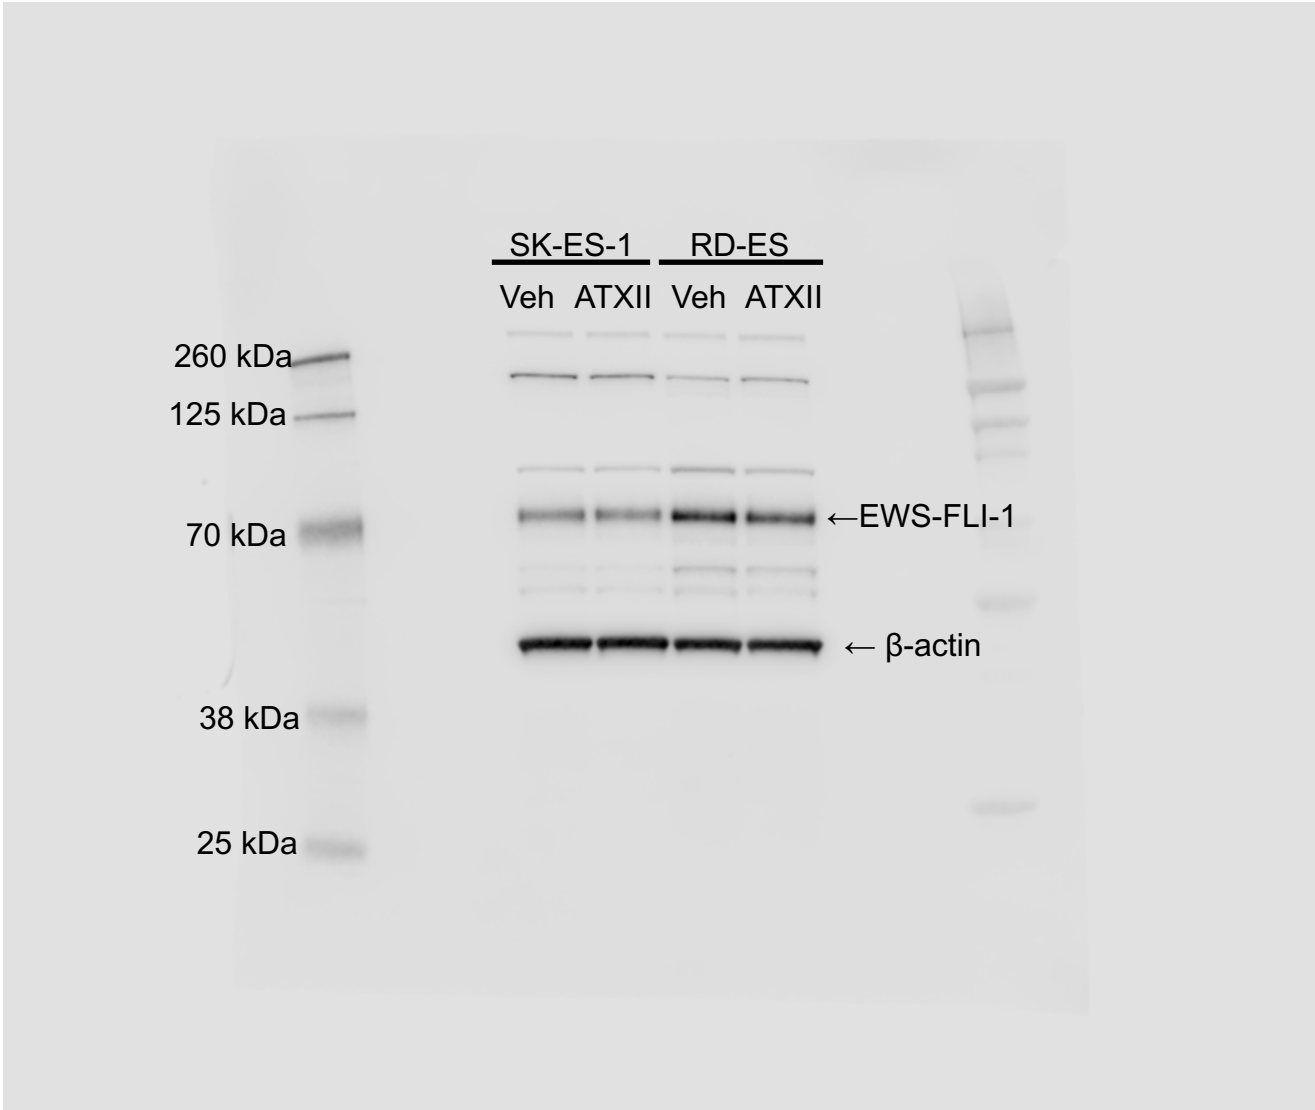

Figure 4A – EWS-FLI-1

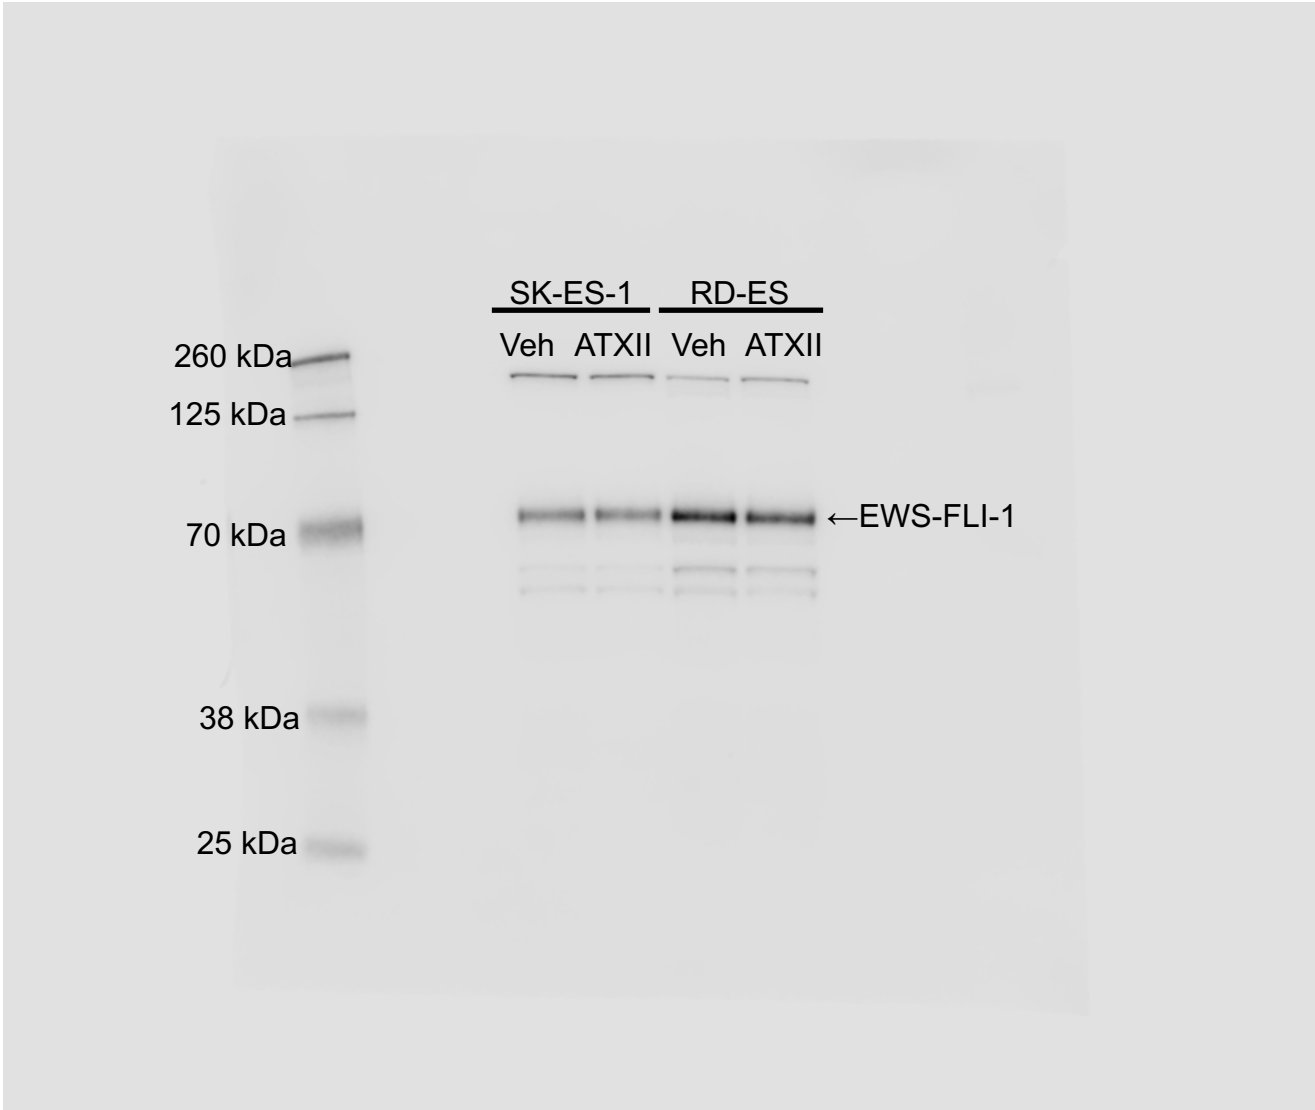

Figure 4A –  $\beta$ -actin

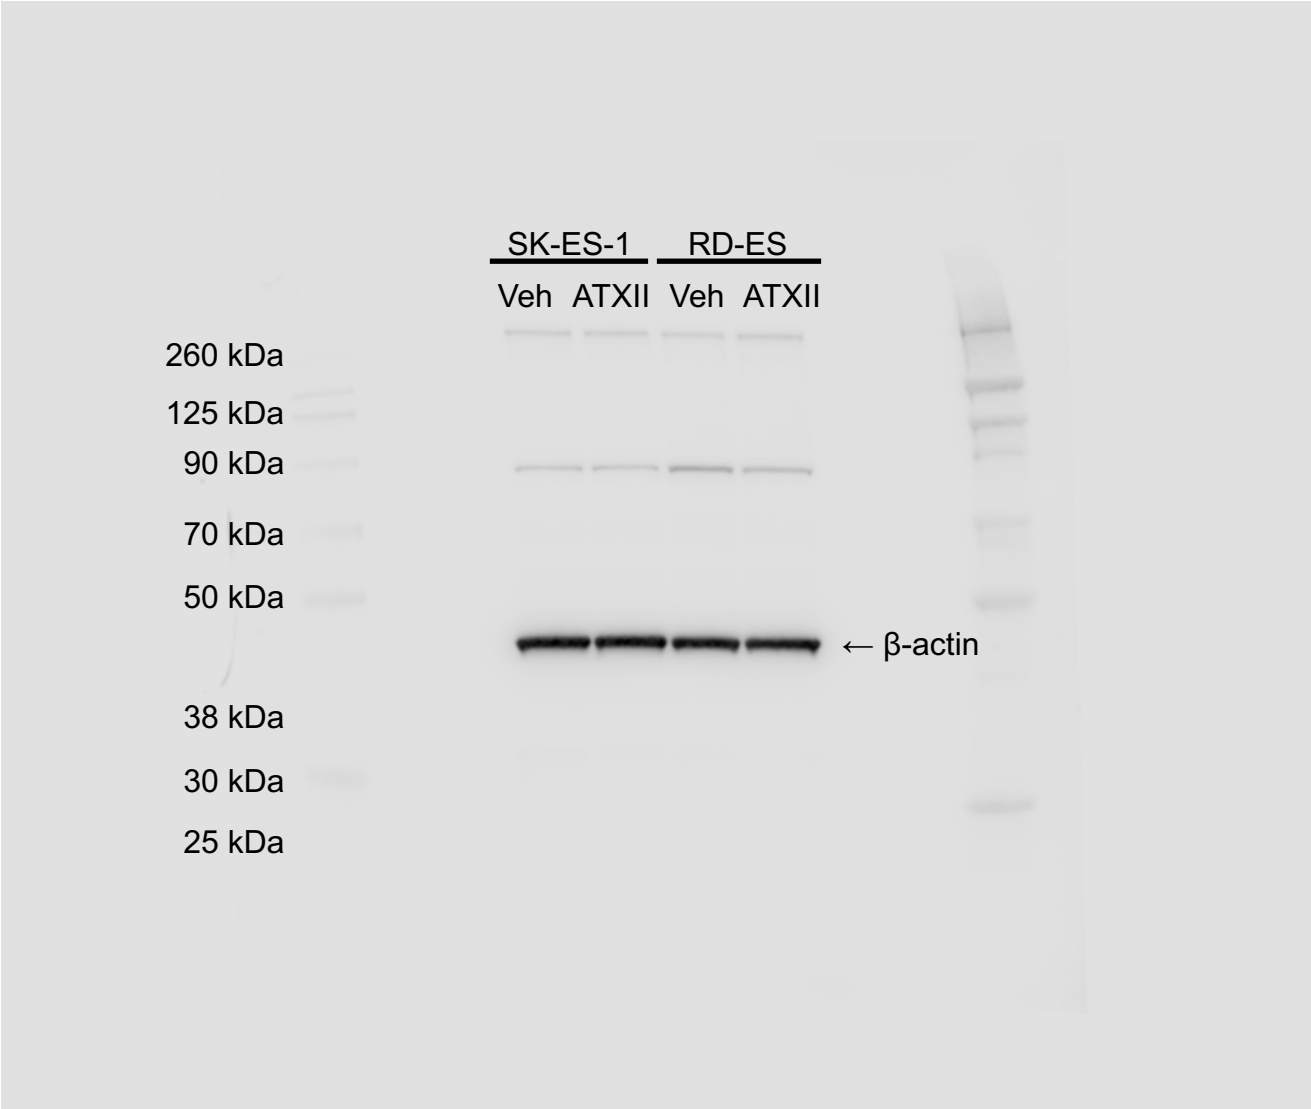

Figure 4B – EWS-FLI-1

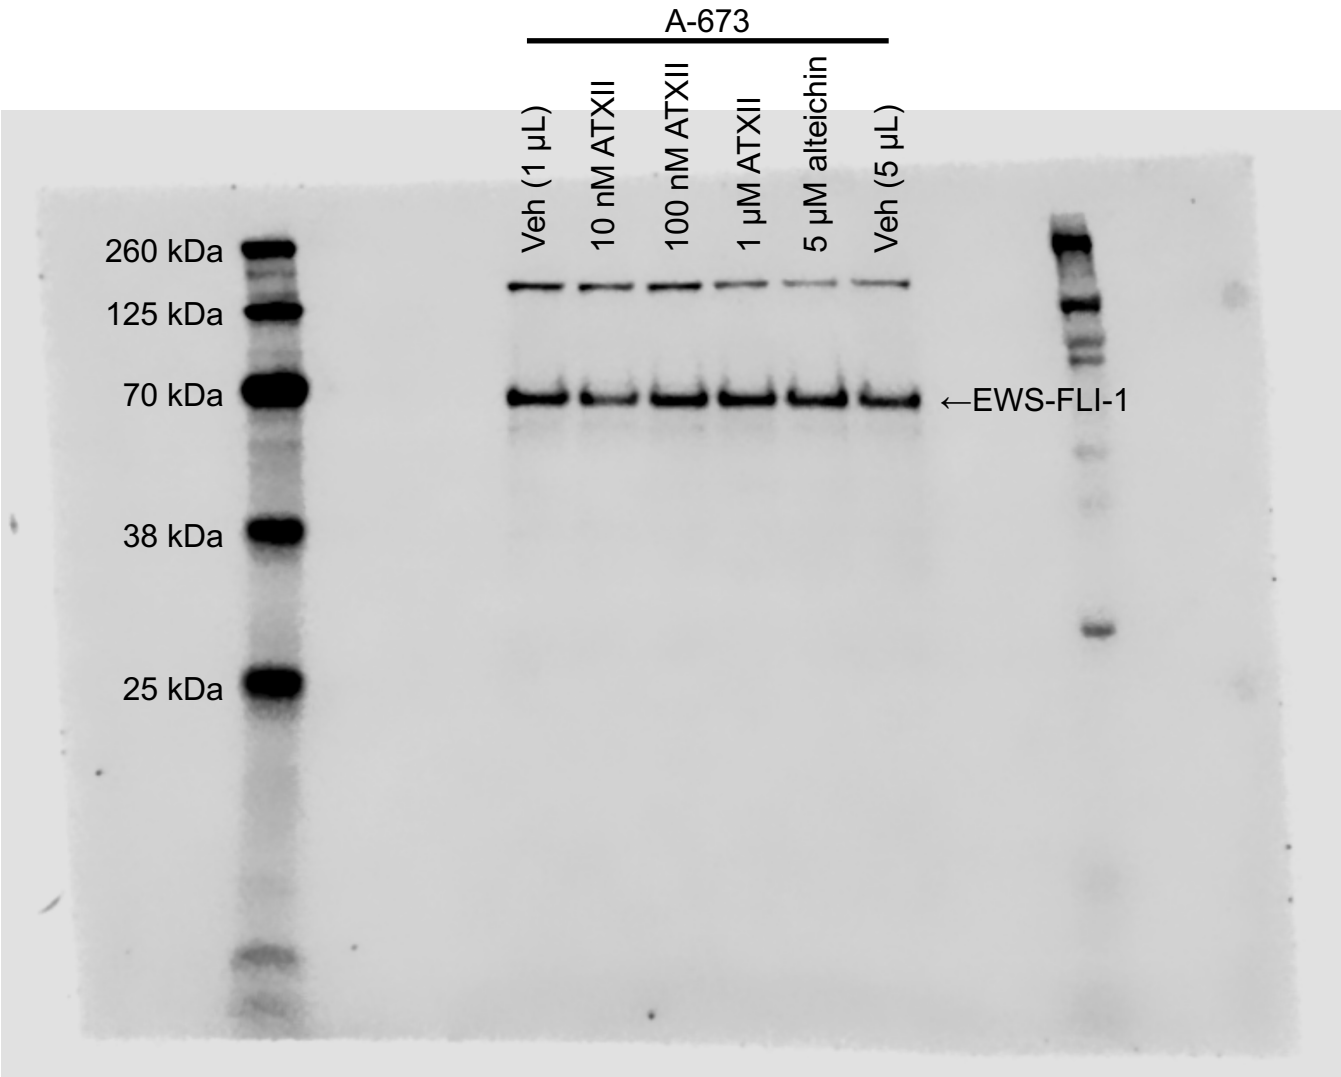



Figure 5A – P-S345-Chk1

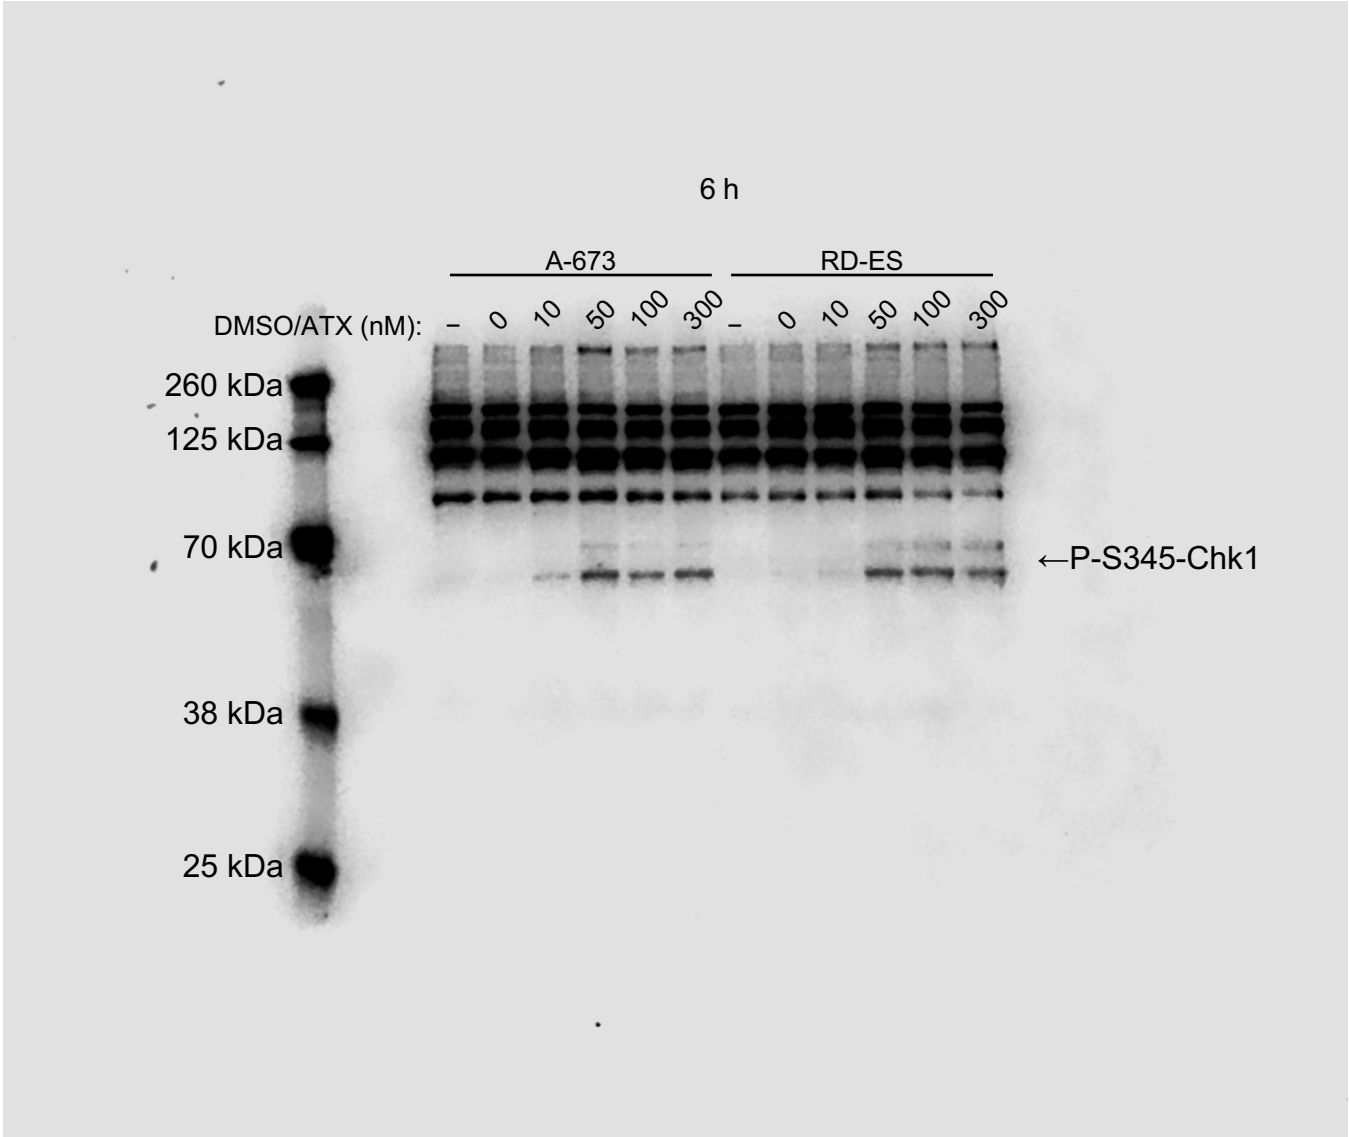

Western blot analysis showing Chk1 phosphorylation in A-673 and RD-ES cells treated with DMSO or ATX for 6 hours. The blot displays bands for Chk1 at approximately 160 kDa, 125 kDa, 90 kDa, 50 kDa, and 30 kDa. The lanes are labeled with DMSO/ATX concentrations (nM) and cell lines (A-673 and RD-ES). The 6 h treatment time is indicated above the lanes.

| Cell Line | DMSO/ATX (nM) | Chk1 Phosphorylation (approx. 160 kDa) |
|-----------|---------------|----------------------------------------|
| A-673     | -             | Low                                    |
|           | 0             | Low                                    |
|           | 10            | Low                                    |
|           | 50            | Low                                    |
|           | 100           | Low                                    |
|           | 300           | Low                                    |
| RD-ES     | -             | Low                                    |
|           | 0             | Low                                    |
|           | 10            | Low                                    |
|           | 50            | Low                                    |
|           | 100           | Low                                    |
|           | 300           | Low                                    |

Figure 5A – P-T68-Chk2

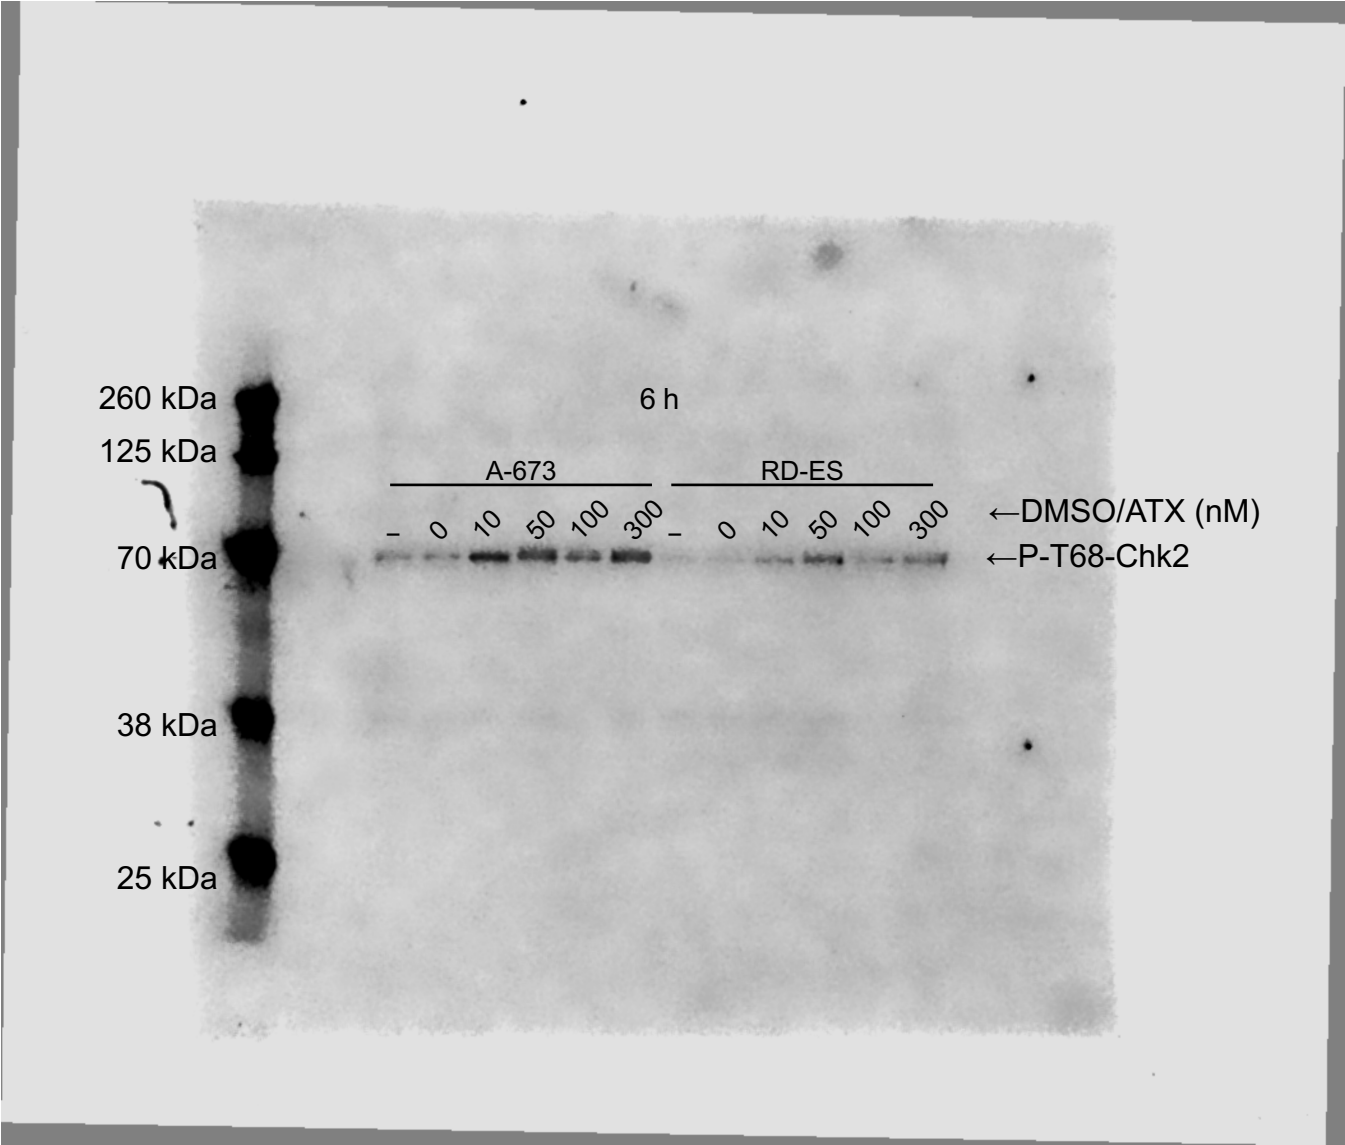

Figure 5A – Chk2

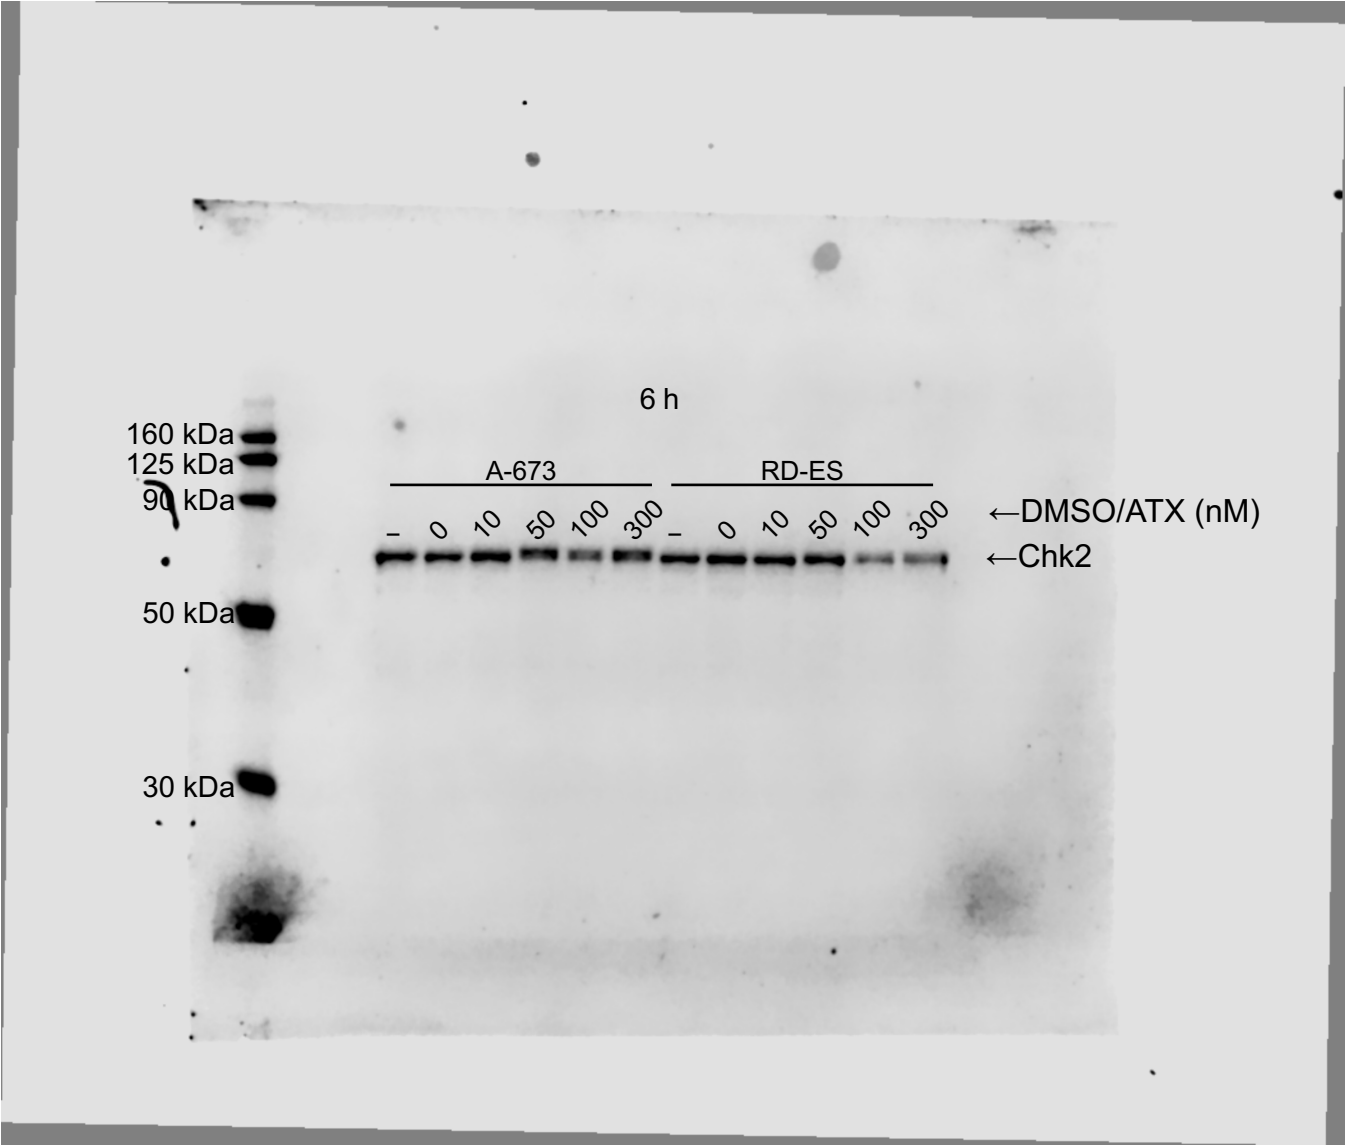

Figure 5A – P-S15-p53

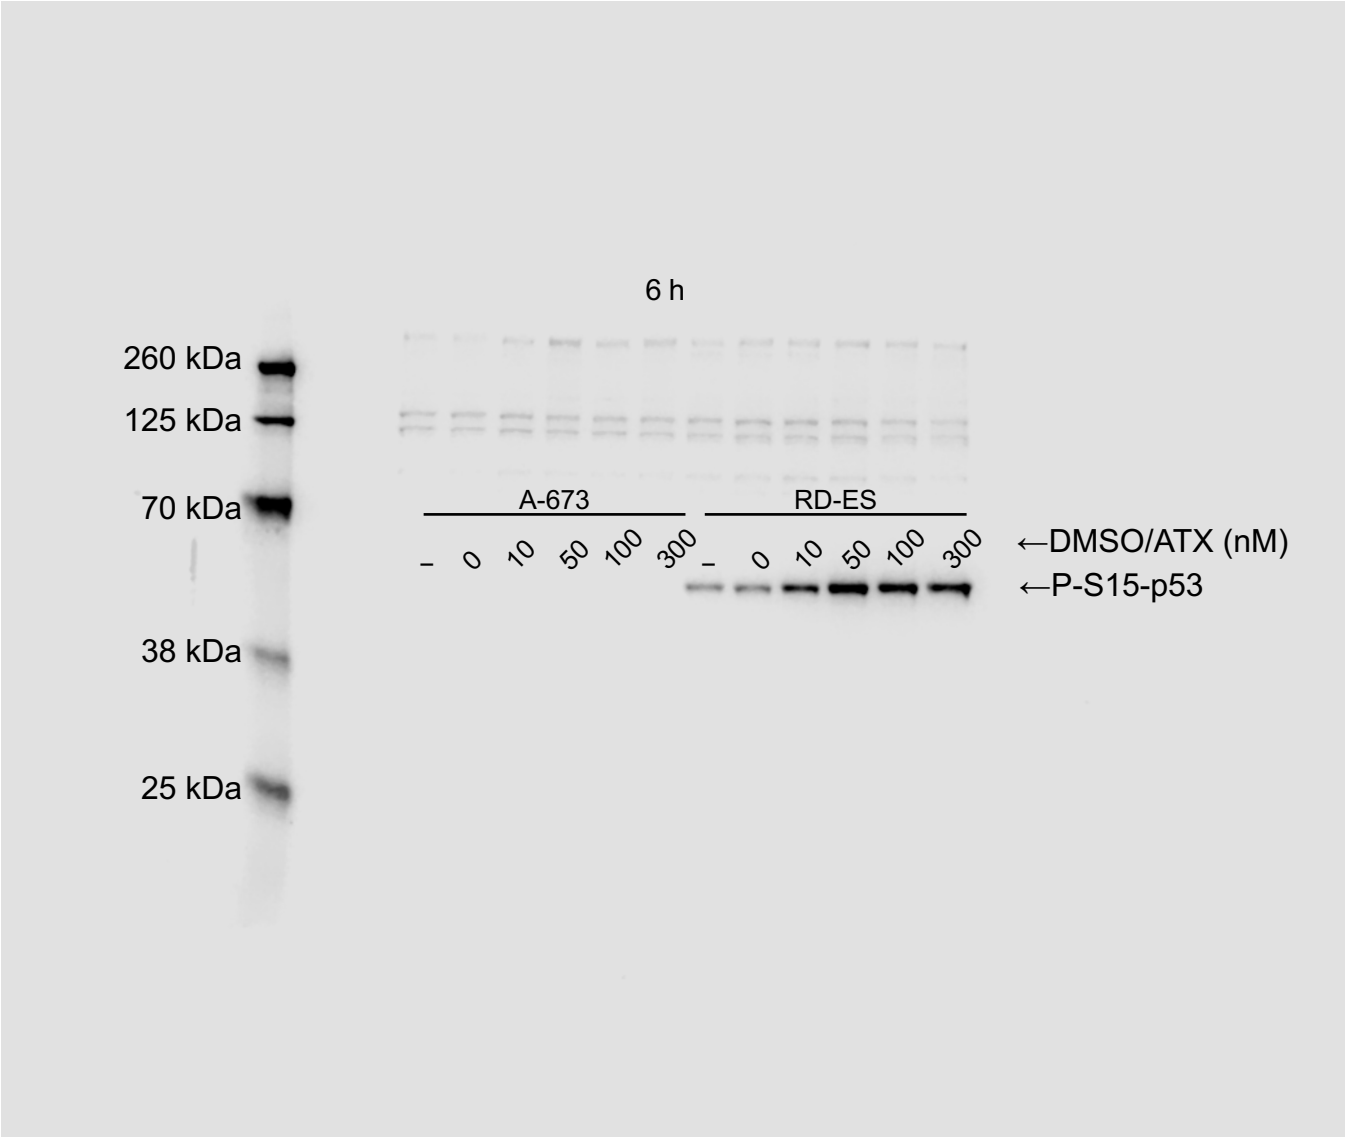

Figure 5A – p53

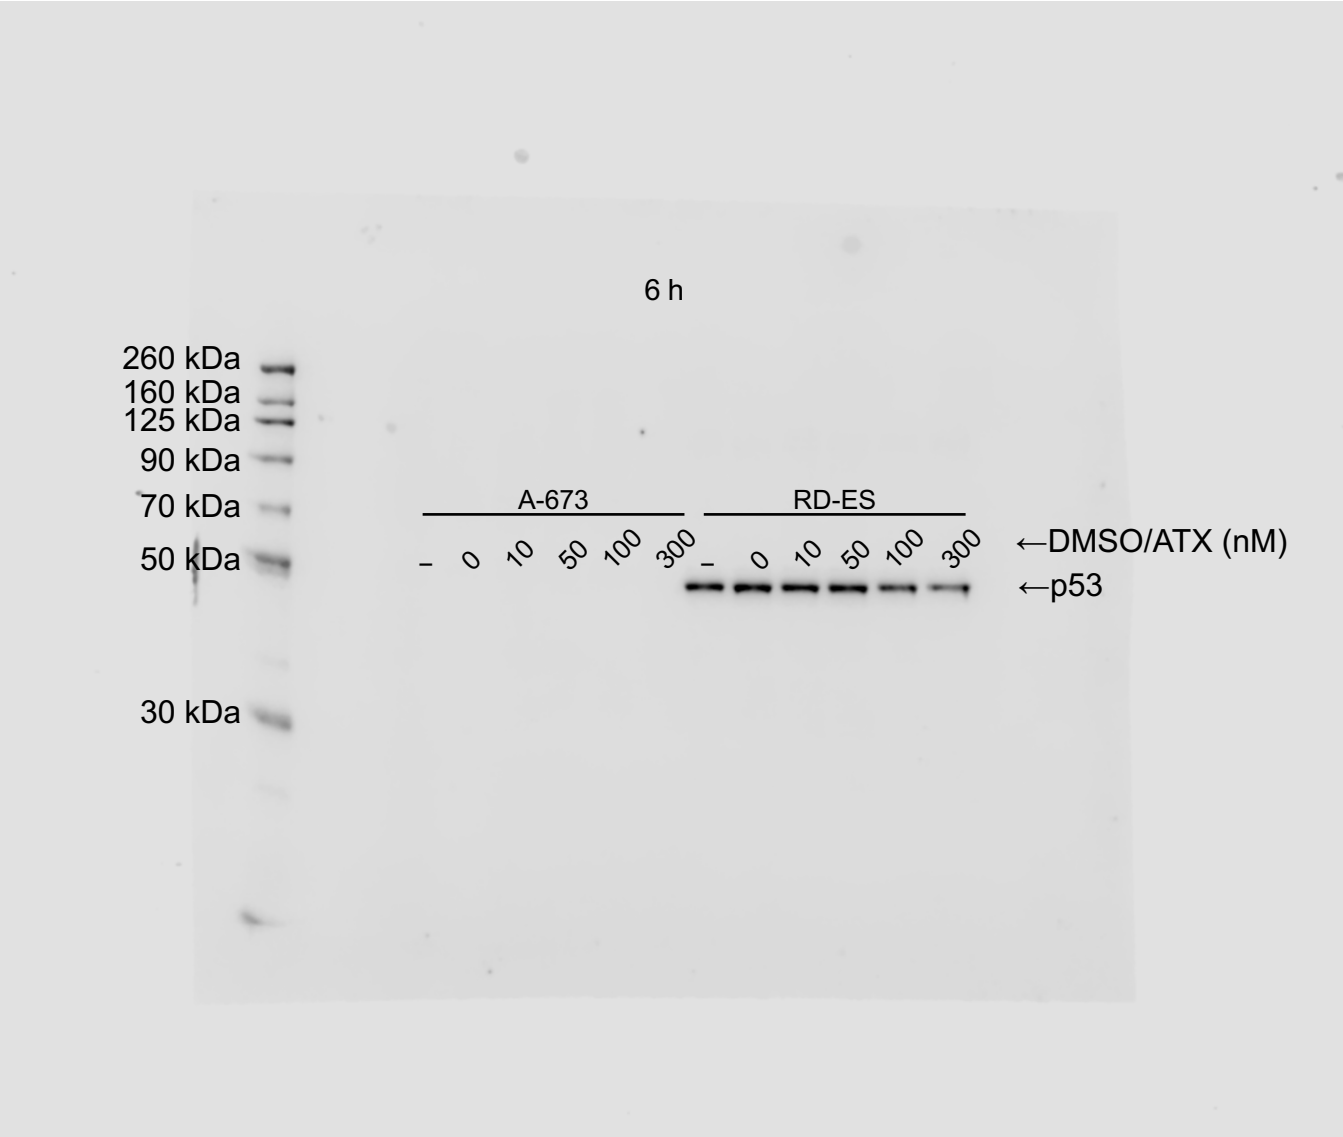

Supplement: s1 [file s1]
