# Supplementary material for: Altertoxin II, a Highly Effective and Specific Compound against Ewing Sarcoma
Source: MDPI journal article supplement (doi:10.3390/cancers13246176), 2021-12-07
Supplement: s1 [file s1]

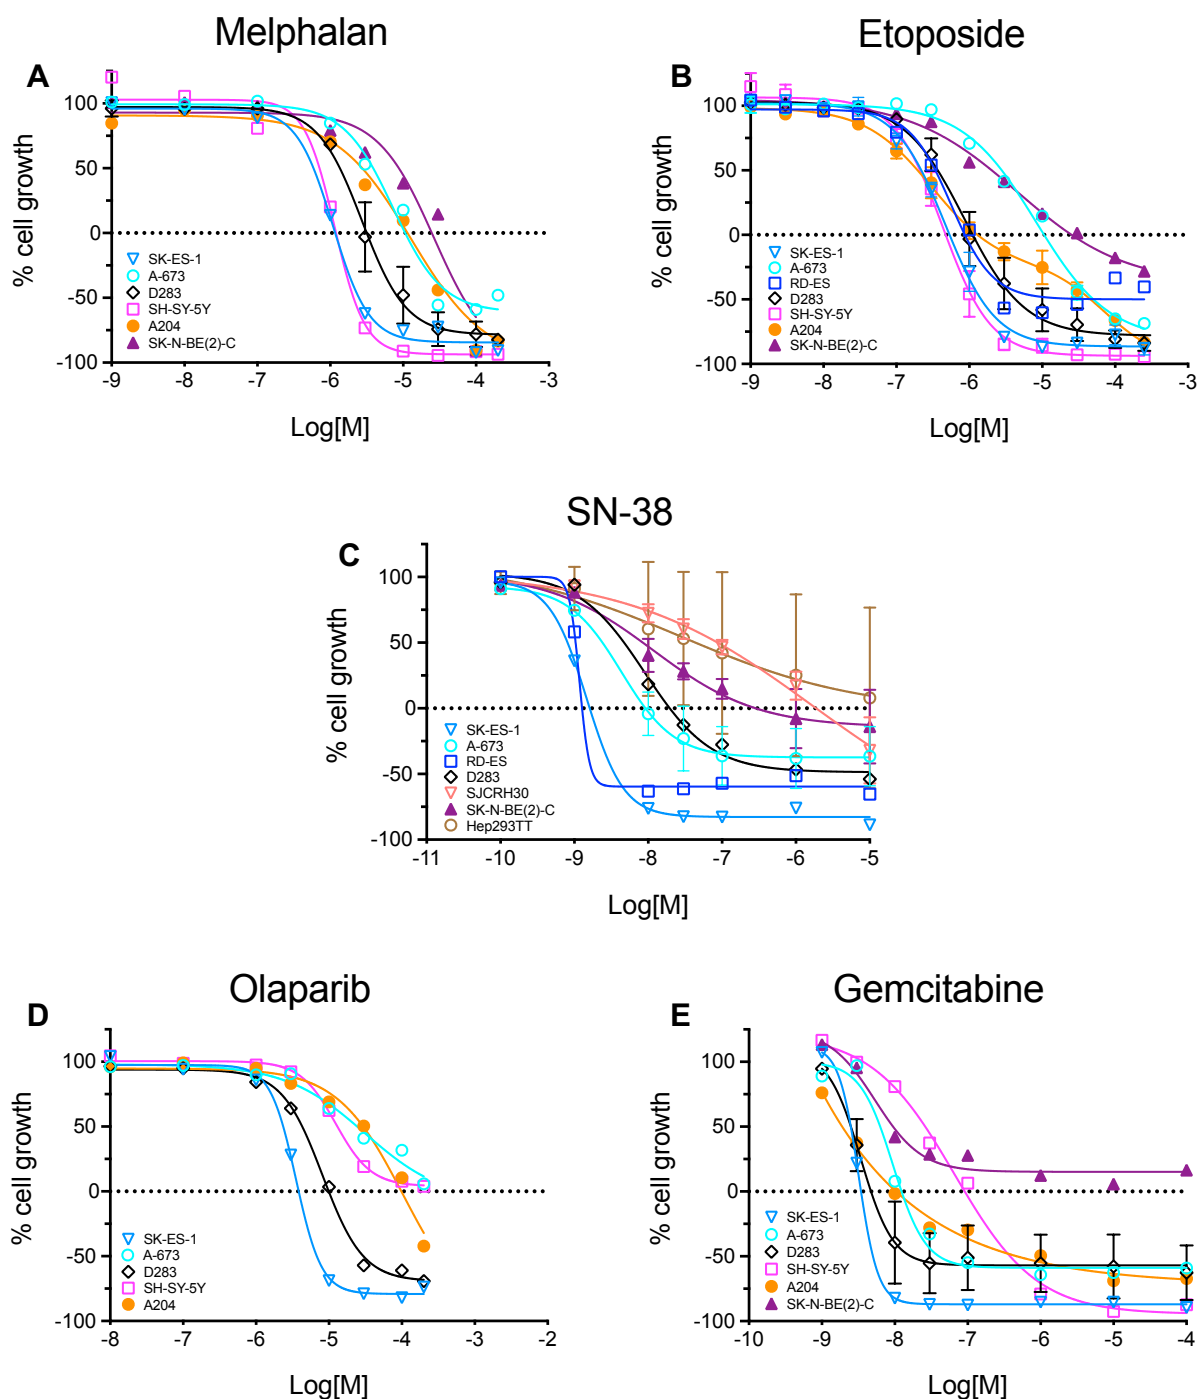

**Figure S1.** Clinically used DNA damaging agents do not show selectivity for Ewing sarcoma cells. Sulforhodamine B (SRB) concentration-response curves for inhibition of cell growth by (A) melphalan, (B) etoposide, (C) SN-38, (D) olaparib and (E) gemcitabine. Cells were treated with indicated compounds for 48 h prior to assessment of cell growth and viability. Results represent mean  $\pm$  SE for  $n = 1-2$  independent experiments with each concentration tested in triplicate.

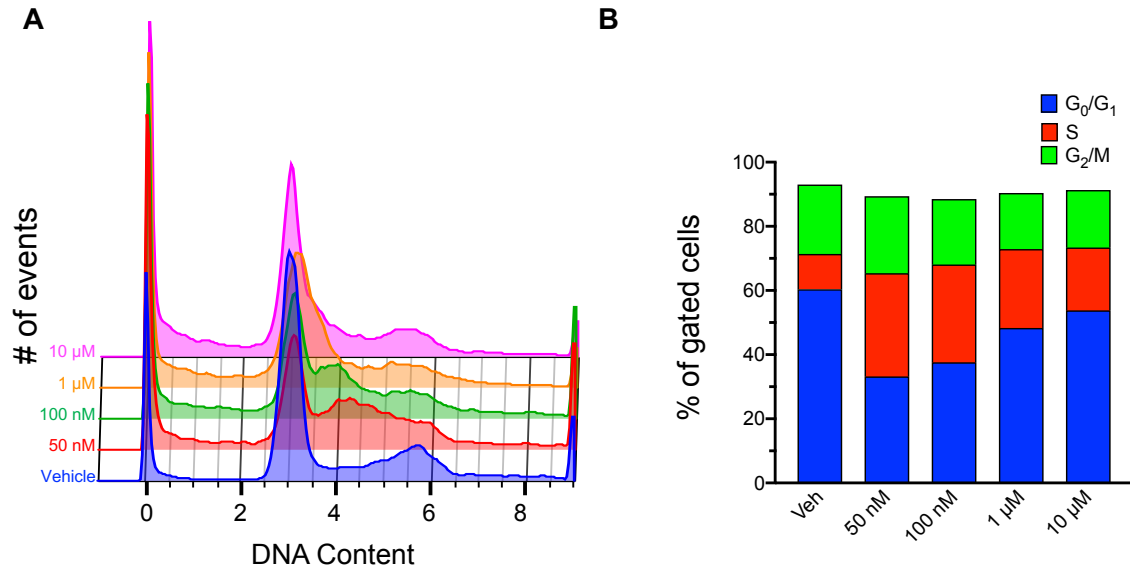

**Figure S2.** Analysis of cell cycle distribution in SK-ES-1 cells by flow cytometry. (A) Histogram of DNA content and (B) Quantification of percent gated cells in different cell cycle phases. Cells were treated for 18 h with indicated concentrations of ATXII and stained with Krishan's reagent.

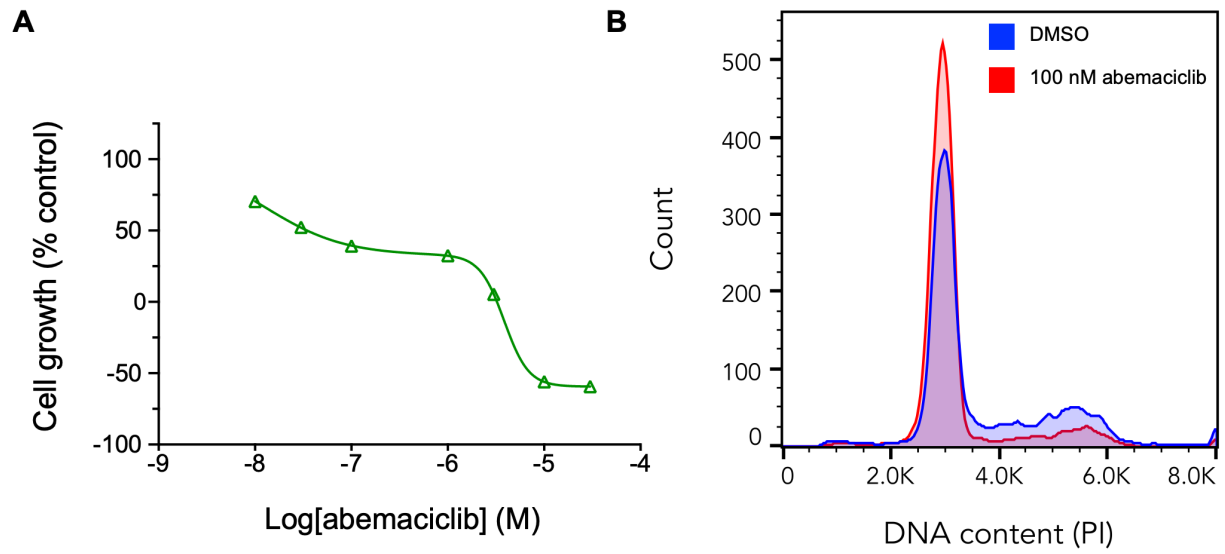

**Figure S3** (A) Concentration-response curve for abemaciclib-mesylate in RD-ES cells after 72 h treatment. (B) Cell cycle profile for RD-ES cells after treatment with 100 nM abemaciclib-mesylate for 24 h.

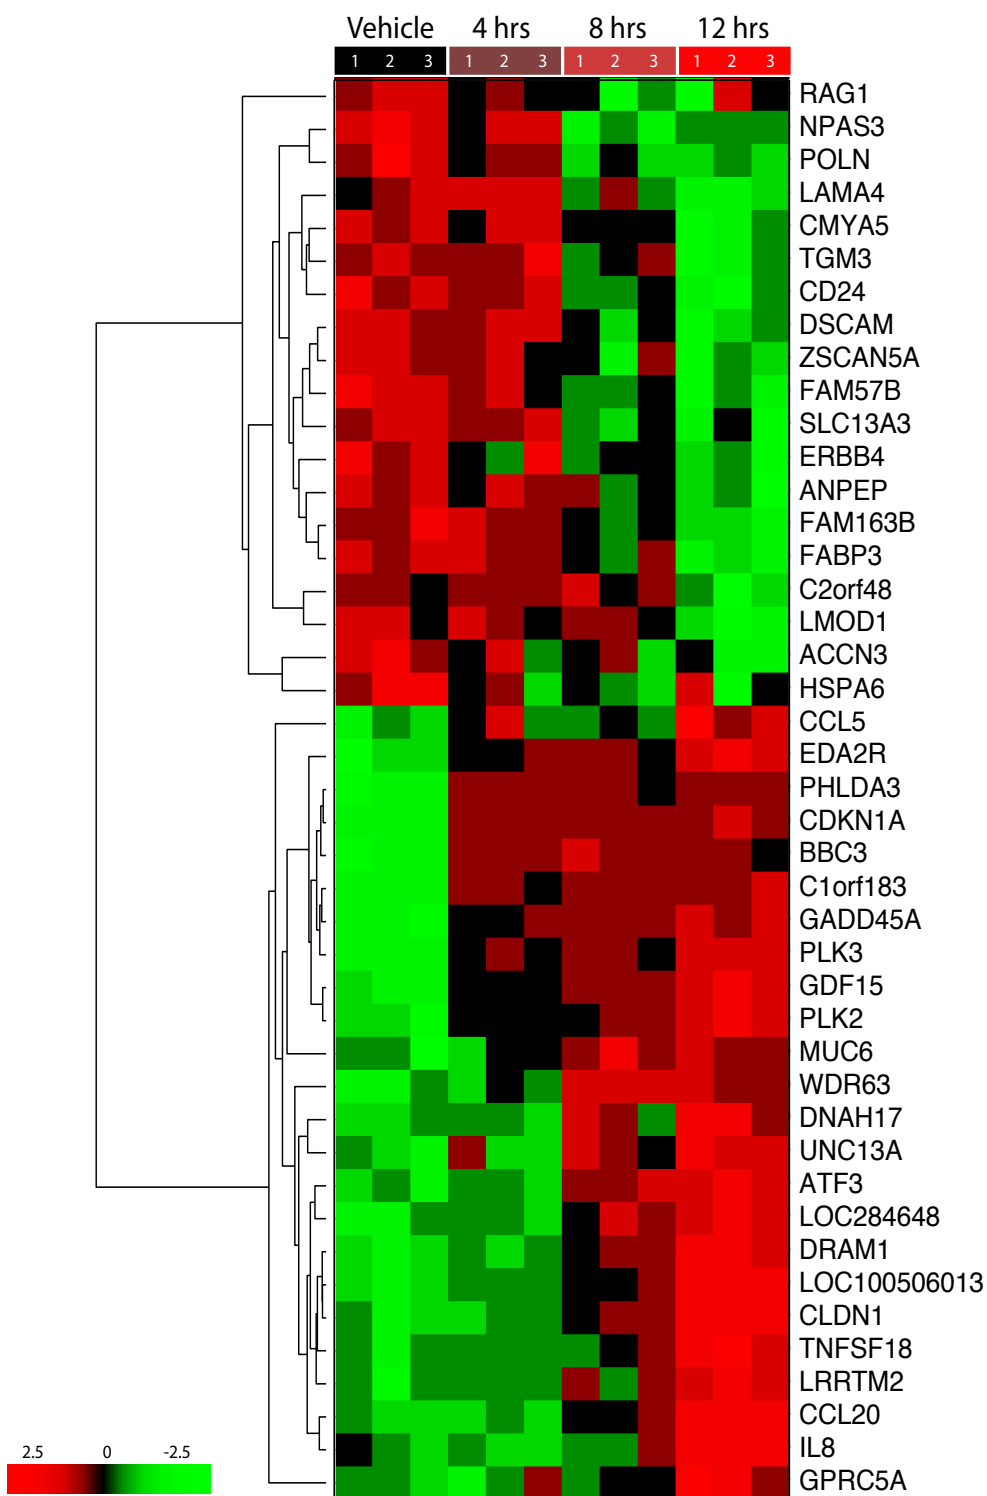

**Figure S4.** Heatmap of differentially expressed genes following treatment of TC32 cells with 10 nM ATXII for 4, 8 and 12 h, evaluated by RNA-sequencing. Cells were treated in triplicate for each of the indicated time points.

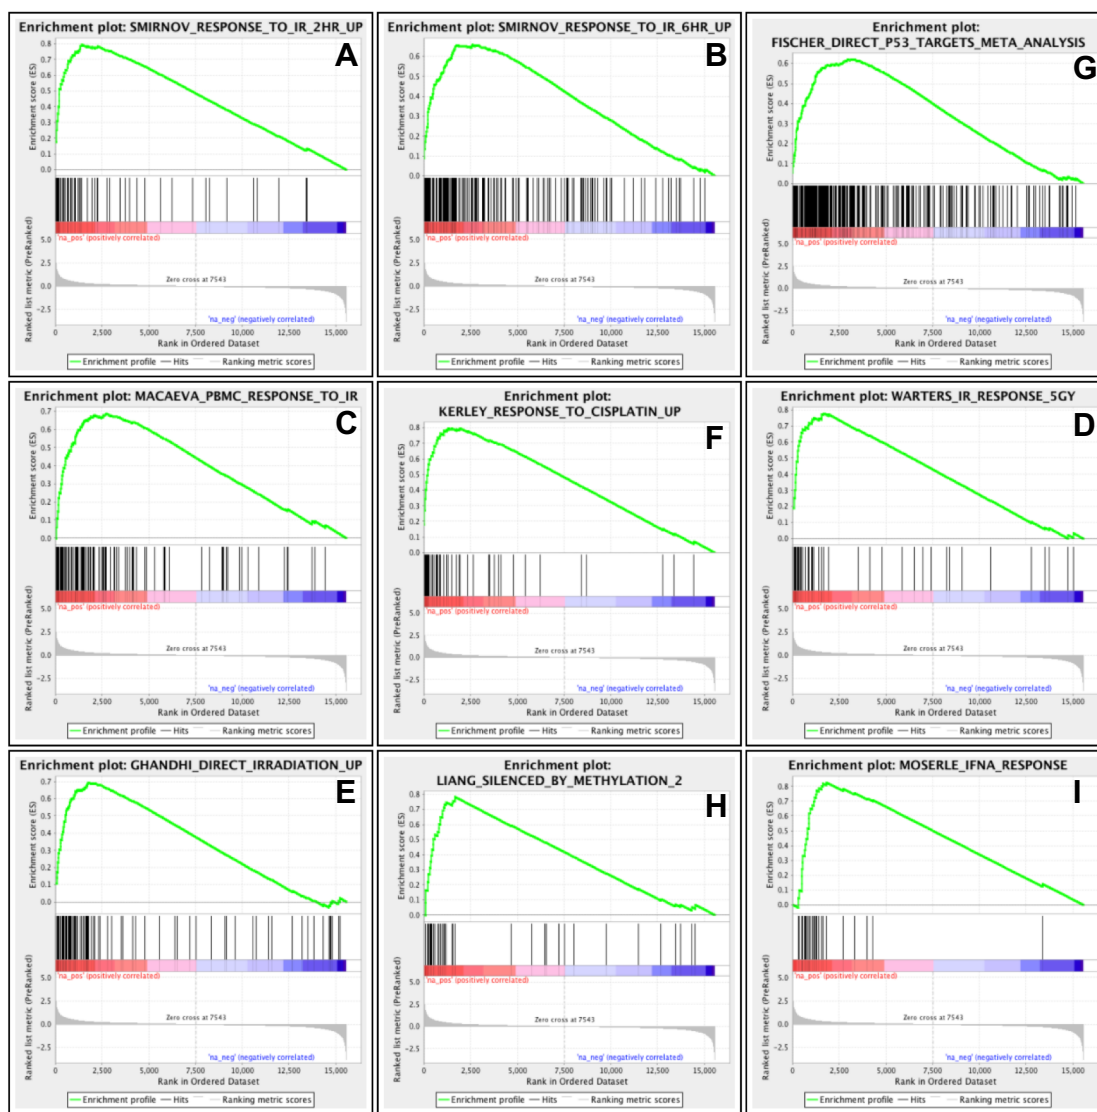

**Figure S5.** Gene set enrichment analysis (GSEA) enrichment plots showing enrichment of genes upregulated in response to ionizing radiation (A-E), cisplatin (F), decitabine (H) or interferon alpha (I) and p53 targets (G) in TC32 cells treated with 10 nM ATXII for 4, 8 or 12 h. RNA expression was evaluated by RNA-sequencing.

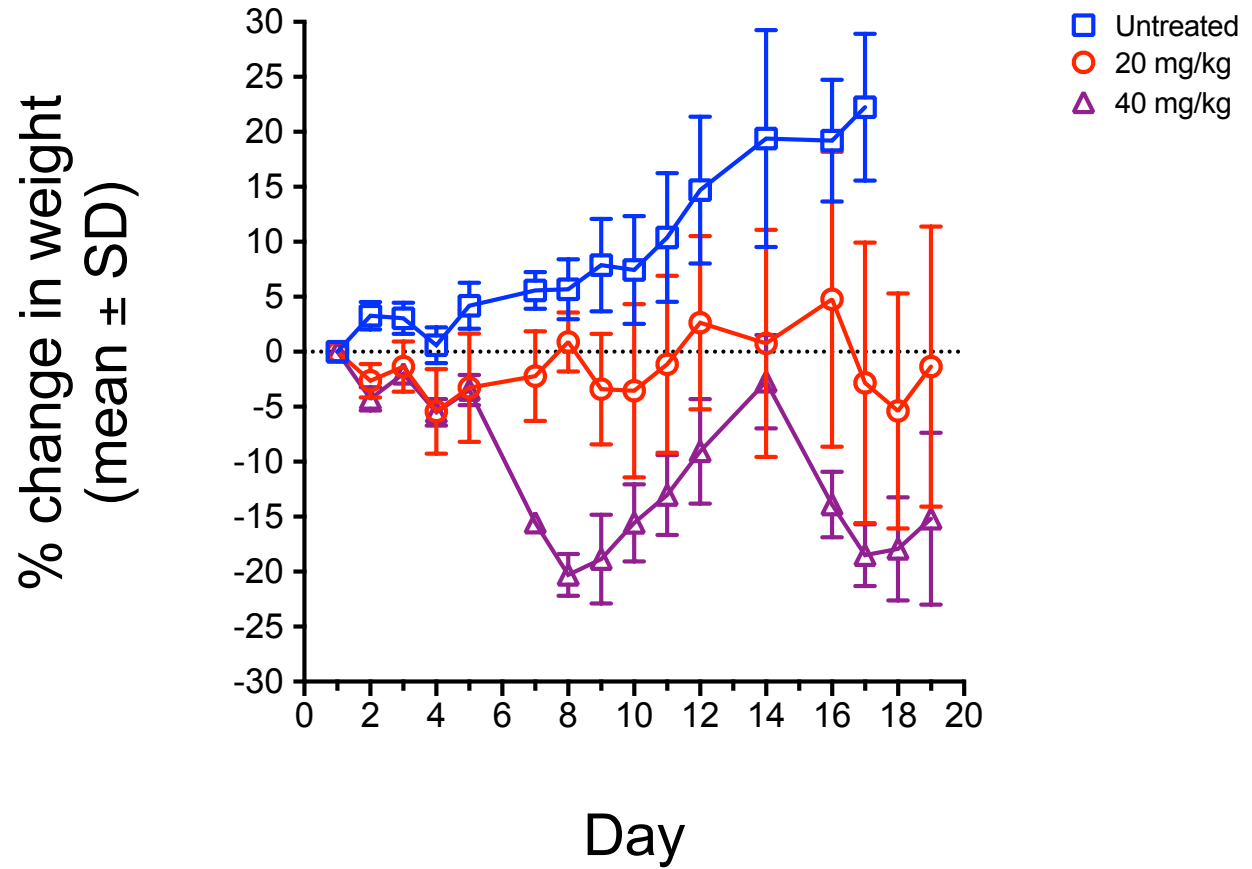

**Figure S6.** Mean percent change in mouse weights over course of trial. Mice were injected i.p. with 20 mg/kg ATXII on days 1, 3, 5, 8, 10 and 12 or 40 mg/kg on days 1, 3 and 5. n = 8-10 tumors per group
